# Supplementary material for: Strings and stripes formed by a protein system interacting via a single-patch attraction
Source: Royal Society of Chemistry journal article supplement (doi:10.1039/c6sm01841f), 2016-01-01
Supplement: c6sm01841f1.pdf [file c6sm01841f1.pdf]

# Supporting Information: Strings and Stripes Formed by a Protein System Interacting via a Directional Patch Attraction

Weimin Li,<sup>†</sup> Maxim Morin,<sup>†</sup> Emil Gustavsson,<sup>†</sup> Björn A. Persson,<sup>‡</sup> Mikael Lund,<sup>‡</sup>  
and Malin Zackrisson Oskolkova<sup>\*,†</sup>

*Division of Physical Chemistry, Lund University, POB 124, 22100 Lund, Sweden, and*

*Division of Theoretical Chemistry, Lund University, POB 124, 22100 Lund, Sweden*

E-mail: malin.zackrisson@fkem1.lu.se

---

\*To whom correspondence should be addressed

<sup>†</sup>Division of Physical Chemistry, Lund University, POB 124, 22100 Lund, Sweden

<sup>‡</sup>Division of Theoretical Chemistry, Lund University, POB 124, 22100 Lund, Sweden

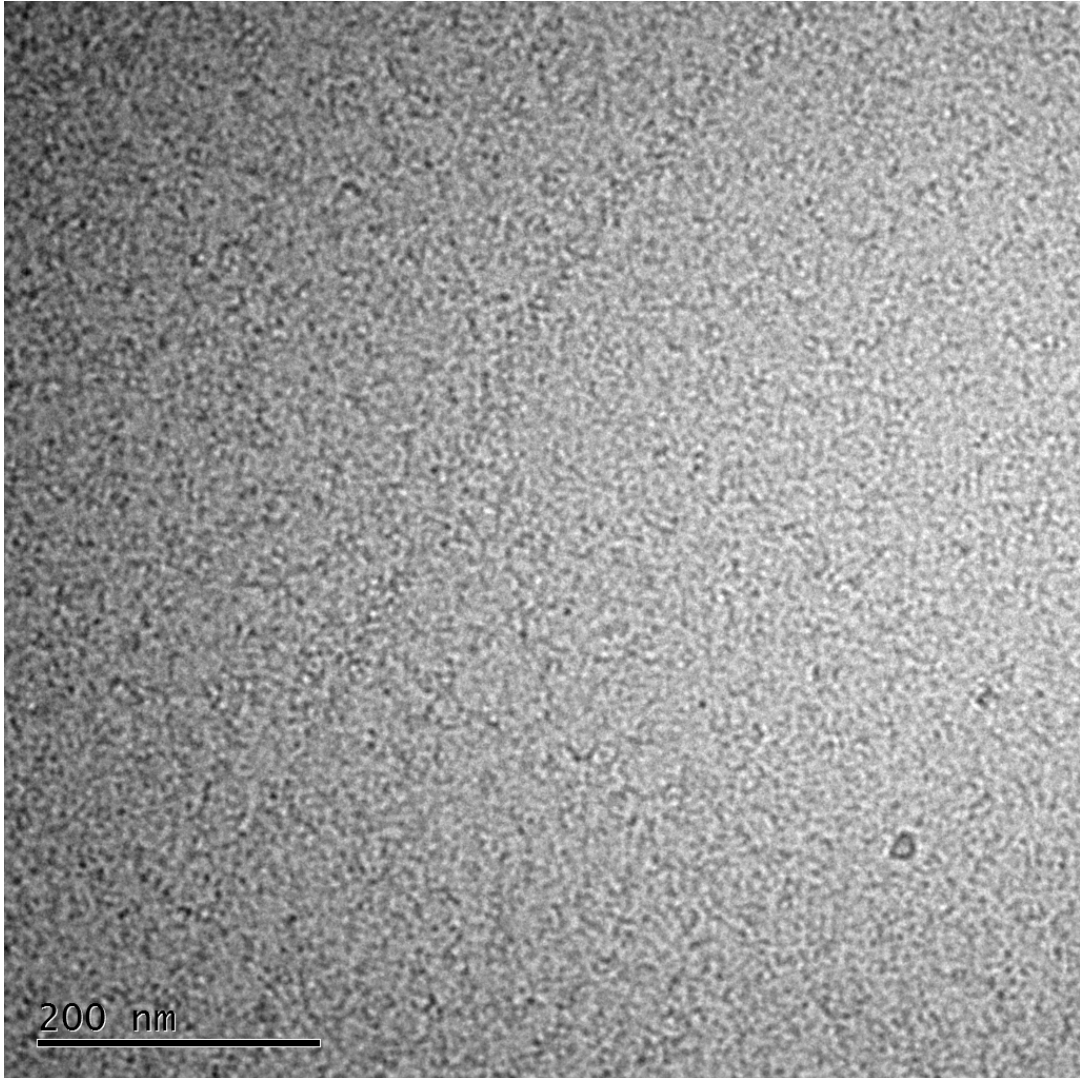

Figure 1: Cryo-TEM image of lactoferrin strings at protein concentration of 80 mg/mL at ionic strength 35 mM and pH 7.

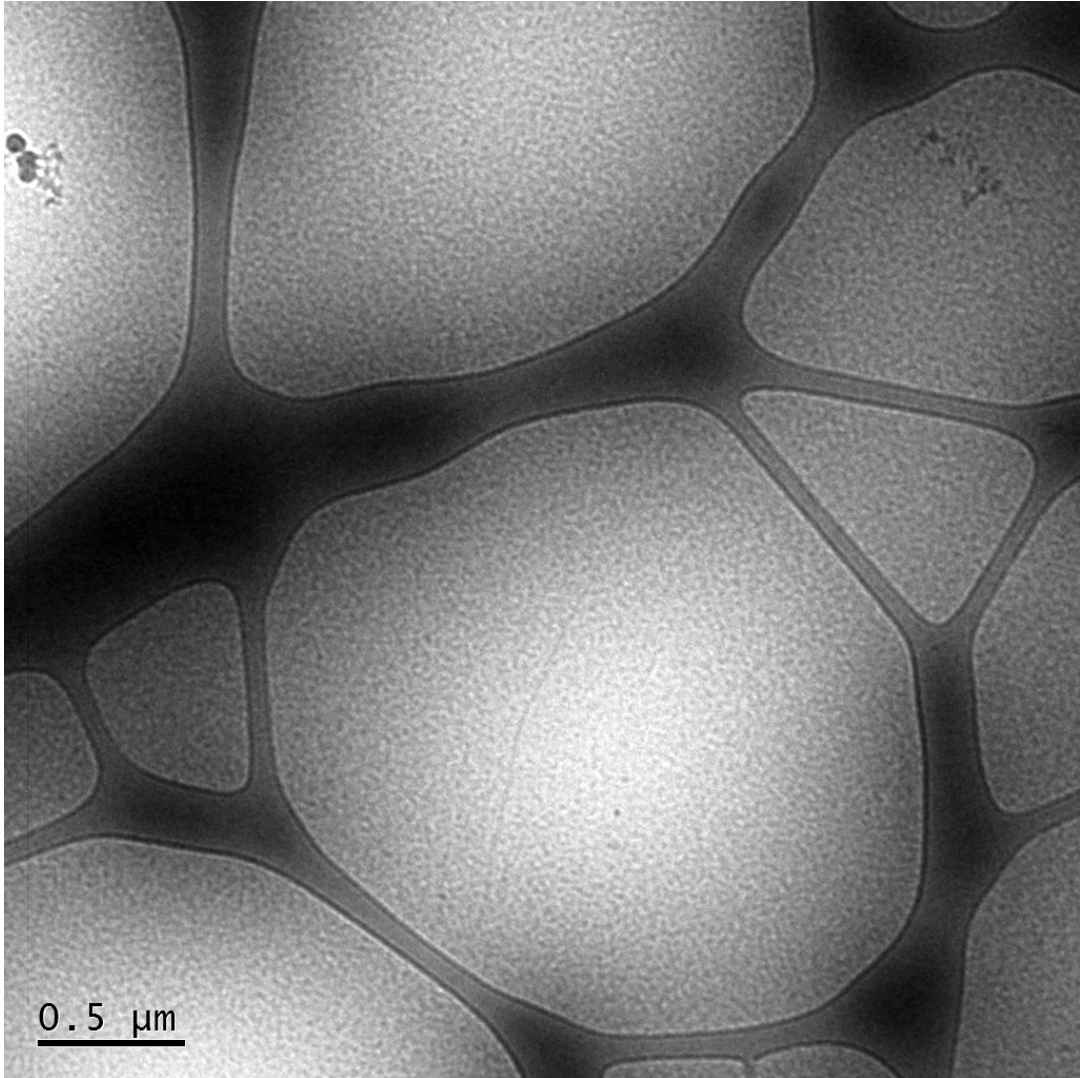

Figure 2: Cryo-TEM image of lactoferrin strings at protein concentration of 80 mg/mL at ionic strength 35 mM and pH 7.
